# Supplementary material
Source: MDPI journal article supplement (https://www.mdpi.com/2073-4344/8/11/491)
Supplement: s1 [file s1]

*Review*

# **Supplementary Materials: Titanium Dioxide/Graphene and Titanium Dioxide/Graphene Oxide Nanocomposites: Synthesis, Characterization and Photocatalytic Applications for Water Decontamination**

**Amr Tayel <sup>1,\*</sup>, Adham R. Ramadan <sup>1</sup> and Omar A. El Seoud <sup>2</sup>**

<sup>1</sup> Department of Chemistry, The American University in Cairo, P.O. Box 74, New Cairo 11835, Egypt; aramadan@aucegypt.edu

<sup>2</sup> Institute of Chemistry, The University of São Paulo, P.O. Box 26077, 05513-970 São Paulo, Brazil; elseoud.usp@gmail.com

\* Correspondence: amr2tayel@aucegypt.edu; Tel.: +20-1-000-288-385

**Table S1.** Synthesis, characterization, and applications of TiO<sub>2</sub>/G and TiO<sub>2</sub>/GO nanocomposites in the literature.

| Synthesis Method | Precursors                                                                                      | Characterization Techniques                                                          | Product Application                                                                    | Remarks                                                                                                                                  | Ref.    |
|------------------|-------------------------------------------------------------------------------------------------|--------------------------------------------------------------------------------------|----------------------------------------------------------------------------------------|------------------------------------------------------------------------------------------------------------------------------------------|---------|
| HT               | TiCl <sub>4</sub> + GO                                                                          | XRD, TEM, FTIR, UV-Vis, Raman, N <sub>2</sub> adsorption/desorption analysis and XPS | Photodegradation of RhB dye and Benzoic acid solutions under visible light irradiation | ----                                                                                                                                     | [56]    |
| Alkaline HT      | P90 + GO + NaOH                                                                                 | XRD, EDX, SEM, TEM, FTIR, PL, UV-Vis and XPS                                         | Photodegradation of Malachite green oxalate dye                                        | An alkaline medium helped in the formation of TiO <sub>2</sub> nanotubes and the reduction of GO to G                                    | [58]    |
| HT               | TiF <sub>4</sub> + GO + HI                                                                      | XRD, SEM, TEM, FTIR, Raman, EIS and XPS                                              | Photodegradation of BPA under UV and visible light irradiation                         | HI was used as a morphology controlling agent and as a reducing agent to produce G from GO                                               | [60]    |
| HT               | TiN + GO + HF                                                                                   | XRD, EDX, SEM, TEM, PL, DRS, N <sub>2</sub> adsorption/desorption analysis and XPS   | Photodegradation of MB under visible light irradiation                                 | HF was used to produce N-doped anatase TiO <sub>2</sub> plates with exposed {001} facets                                                 | [62]    |
| HT               | TiCl <sub>4</sub> + GO + H <sub>2</sub> O <sub>2</sub> + urea + NH <sub>4</sub> VO <sub>3</sub> | XRD, TEM, DRS, Raman, EIS, and XPS                                                   | Photodegradation of AO7 under visible light irradiation                                | Urea is used as a source of N and NH <sub>4</sub> VO <sub>3</sub> as a source of V to produce N,V-TiO <sub>2</sub> -G samples            | [57]    |
| HT               | TiO <sub>2</sub> + GO + APTMS                                                                   | XRD, TEM, SEM, DRS, Raman, elemental analysis, FTIR, PL and AFM                      | Photodegradation of MB under visible light irradiation and Photocurrent measurements   | APTMS was used to produce positive charges on TiO <sub>2</sub> surface so negatively charged GO was wrapped by electrostatic interaction | [63,64] |
| HT               | TIP + TEA + GO + PP filter + AgNO <sub>3</sub>                                                  | XRD, SEM, UV-Vis and TGA                                                             | Photodegradation of MB using TiO <sub>2</sub> /G modified filters                      | AgNO <sub>3</sub> was used for Ag doping                                                                                                 | [66]    |
| HT               | P25 + GO                                                                                        | XRD, TEM, N <sub>2</sub> adsorption/desorption analysis, TGA, and DRS                | Photodegradation of MB and RBk5 under UV light irradiation                             | ----                                                                                                                                     | [61]    |
| HT               | TiO <sub>2</sub> nanowires + GO                                                                 | XRD, TEM, SEM, FTIR, Raman, and EIS                                                  | Photodegradation of MB under the simulated solar light.                                | TiO <sub>2</sub> nanowires were more uniformly distributed with less agglomeration on G surface than                                     | [73]    |

| TiO <sub>2</sub> nanoparticles |                                                  |                                                                                                       |                                                                                                            |                                                                                                                                                                    |      |
|--------------------------------|--------------------------------------------------|-------------------------------------------------------------------------------------------------------|------------------------------------------------------------------------------------------------------------|--------------------------------------------------------------------------------------------------------------------------------------------------------------------|------|
| ST                             | TiCl <sub>4</sub> + EG + G + NH <sub>3</sub>     | XRD, TEM, SEM, N <sub>2</sub> adsorption/desorption analysis, EIS and elemental analysis              | Anodic material for lithium-ion batteries                                                                  | NH <sub>3</sub> and EG were used to produce homogeneous and stable TiO <sub>2</sub> /G nanocomposite                                                               | [82] |
| ST                             | TBT + GO + acid-treated MWCNTs                   | XRD, SEM, PL, and DRS                                                                                 | Photodegradation of MB and photoreduction of Cr(VI) under UV light irradiation                             | PL was used to analyze the hydroxyl radicals produced during the photocatalytic reaction                                                                           | [83] |
| ST                             | TBT + G + NH <sub>3</sub>                        | XRD, TEM, and Raman                                                                                   | Photodegradation of MB                                                                                     | N-doped TiO <sub>2</sub> /G nanocomposites were produced and NH <sub>3</sub> was the N source                                                                      | [84] |
| ST                             | TiCl <sub>4</sub> /TIP + GO + P123               | XRD, TEM, AFM, Raman, N <sub>2</sub> adsorption/desorption analysis and XPS                           | Photodegradation of RhB, Aldicarb, and Norfloxacin under simulated sunlight and visible light irradiation. | P123 was used to prevent the aggregation of TiO <sub>2</sub> nanoparticles and G sheets                                                                            | [85] |
| ST                             | TBT + G                                          | XRD, TEM, DRS, TG-DTA, PL, EIS and XPS                                                                | Photodegradation of HCHO under UV light irradiation                                                        | ----                                                                                                                                                               | [86] |
| ST                             | TIP+GO                                           | XRD, TEM, SEM, FTIR, DRS, PL and XPS                                                                  | Photodegradation of MB under UV and visible light irradiation                                              | ----                                                                                                                                                               | [87] |
| ST                             | TBT + GO + HF                                    | XRD, TEM, SEM, AFM, Raman, FTIR, TGA, PL, N <sub>2</sub> adsorption/desorption analysis, EPR, and XPS | Photodegradation of MB under UV light irradiation                                                          | HF was used to produce anatase TiO <sub>2</sub> plates with exposed {001} facets<br>ESR was used to study the Reactive Oxygen Radicals (*OH and O <sub>2</sub> *-) | [89] |
| Mixing and sonication          | TIP +GO                                          | XRD, TEM, DRS, FTIR, N <sub>2</sub> adsorption/desorption analysis and XPS                            | Photodegradation of 2,4-D and RR195 under UV and visible irradiations                                      | CTAB, H <sub>2</sub> PtCl <sub>6</sub> , palladium (II) acetate and NaBH <sub>4</sub> can be added to produce metal doped TiO <sub>2</sub> /G nanocomposites       | [17] |
| Mixing and sonication          | Oleic acid capped TiO <sub>2</sub> nanorods + GO | XRD, TEM, UV-Vis, PL, and XPS                                                                         | Photodegradation of AO7 under UV light irradiation                                                         | Oleic acid stabilized the formed TiO <sub>2</sub> nanorods                                                                                                         | [92] |
| Mixing and                     | P25 + GO                                         | XRD, TEM, SEM, UV-Vis, FTIR, N <sub>2</sub>                                                           | Photodegradation of MB under                                                                               | ----                                                                                                                                                               | [93] |

|                       |                                                      |                                                                                                   |                                                                                  |                                                                                                             |           |
|-----------------------|------------------------------------------------------|---------------------------------------------------------------------------------------------------|----------------------------------------------------------------------------------|-------------------------------------------------------------------------------------------------------------|-----------|
| sonication            |                                                      | adsorption/desorption analysis and EDX                                                            | UV and visible light irradiation                                                 |                                                                                                             |           |
| Mixing and sonication | TiO <sub>2</sub> + Carboxy G                         | XRD, TEM, SEM, EDX, UV–Vis, FTIR, PL and Raman                                                    | Photodegradation of RhB under simulated solar light                              | Carboxy functionalization improved the binding of TiO <sub>2</sub> and enhanced the photocatalytic activity | [94]      |
| Mixing and sonication | P25 + GO                                             | SEM, EDX, N <sub>2</sub> adsorption/desorption analysis, DRS, pH <sub>PZC</sub> , DRIFT, and DTG, | Photodegradation of MO and DP under near-UV/Vis irradiation                      | The surface chemistry of the prepared nanocomposites was measured by pH <sub>PZC</sub>                      | [90]      |
| Sol-gel               | Titania peroxo-complex + GO                          | XRD, TEM, AFM, N <sub>2</sub> adsorption/desorption analysis, FTIR, Raman, DRS and XPS            | Photodegradation of butane gas under UV and visible light irradiation            | ----                                                                                                        | [16]      |
| Sol-gel               | TIP + CTAB +G                                        | XRD, SEM, FTIR, DRS and TG-DTA                                                                    | Photodegradation of MB under simulated solar and visible light irradiation       | ----                                                                                                        | [101]     |
| LPD                   | (NH <sub>4</sub> ) <sub>2</sub> TiF <sub>6</sub> +GO | SEM, TEM, AFM, N <sub>2</sub> adsorption/desorption analysis, DTG, Raman, DRS and XPS             | Photodegradation of MO and DP under near-UV/Vis and visible light irradiation    | Thermal treatment to reduce GO to G                                                                         | [104,105] |
| LPD                   | (NH <sub>4</sub> ) <sub>2</sub> TiF <sub>6</sub> +GO | XRD, SEM, AFM, N <sub>2</sub> adsorption/desorption analysis, TG-DTA, Raman and XPS               | Photodegradation of MO and photoreduction of Cr(VI) under UV light irradiation   | ----                                                                                                        | [106]     |
| CVD                   | TiO <sub>2</sub> +acetylene                          | TEM, Raman, FTIR, DRS, and TGA                                                                    | Photodegradation of phenol under visible light irradiation                       | Acetylene was used as a source of G                                                                         | [113]     |
| LBL                   | Polysulfone membrane + TiO <sub>2</sub> + GO         | SEM, UV–Vis, and XPS                                                                              | Photodegradation of MB under UV and simulated solar light irradiation            | UV irradiation to reduce GO to G is performed                                                               | [114]     |
| Micro-wave assisted   | P25 + GO                                             | XRD, TEM, FTIR, N <sub>2</sub> adsorption/desorption analysis and DRS                             | Photodegradation of MB                                                           | ----                                                                                                        | [115]     |
| Spin coating          | TBLAH + G + glycerol                                 | XRD, TEM, SEM, DRS and contact angle meter                                                        | Photodegradation of MB under UV light irradiation for self-cleaning applications | Glycerol to increase the homogeneity of TBLAH /G dispersion                                                 | [19]      |

## Abbreviations

|                               |                                                                                                 |
|-------------------------------|-------------------------------------------------------------------------------------------------|
| 2,4-D                         | 2,4-dichlorophenoxyacetic acid;                                                                 |
| AFM                           | atomic force microscopy;                                                                        |
| AO7                           | acid orange 7;                                                                                  |
| APTMS                         | 3-aminopropyl-trimethoxysilane;                                                                 |
| BET                           | Brunauer–Emmett–Teller;                                                                         |
| BPA                           | bisphenol A;                                                                                    |
| CTAB                          | cetyl trimethylammonium bromide;                                                                |
| CVD                           | chemical vapor deposition;                                                                      |
| DP                            | diphenhydramine;                                                                                |
| DRIFT                         | diffuse reflectance Fourier transform infrared spectroscopy;                                    |
| DRS-UV                        | diffuse reflectance UV-Vis spectroscopy;                                                        |
| DTA                           | differential thermal analysis;                                                                  |
| <i>E. coli</i>                | <i>Escherichia coli</i> ;                                                                       |
| EDX                           | energy dispersive X-ray analysis;                                                               |
| EG                            | ethylene glycol;                                                                                |
| EIS                           | electrochemical impedance spectroscopy;                                                         |
| ESR                           | electron spin resonance;                                                                        |
| FTIR                          | Fourier transform infrared spectroscopy;                                                        |
| G                             | graphene;                                                                                       |
| GO                            | graphene oxide                                                                                  |
| H <sub>2</sub> O <sub>2</sub> | Hydrogen peroxide;                                                                              |
| HT                            | hydrothermal;                                                                                   |
| LBL                           | layer by layer;                                                                                 |
| LPD                           | liquid phase deposition;                                                                        |
| MB                            | methylene blue;                                                                                 |
| MO                            | methyl orange;                                                                                  |
| MWCNTs                        | multi-wall carbon nanotubes;                                                                    |
| N,V–TiO <sub>2</sub> –G       | Nitrogen and Vanadium co-doped TiO <sub>2</sub> /G nanocomposites;                              |
| NIR                           | near-infrared;                                                                                  |
| P123                          | triblock copolymer based on poly(ethylene glycol)-poly(propylene glycol)-poly(ethylene glycol); |
| pHPZC                         | the point zero of charge;                                                                       |
| PL                            | photoluminescence spectroscopy;                                                                 |
| PP filter                     | polypropylene filter;                                                                           |
| QCM-D                         | quartz crystal microbalance with dissipation;                                                   |
| RBK-5                         | reactive black-5;                                                                               |

|       |                                                 |
|-------|-------------------------------------------------|
| RhB   | rhodamine B;                                    |
| RR195 | reactive red 195;                               |
| SEM   | scanning electron microscopy;                   |
| ST    | solvothermal;                                   |
| TBLAH | Titanium (IV) bis ammonium lactate dihydroxide; |
| TBT   | tetrabutyl-titanate;                            |
| TEA   | triethanolamine;                                |
| TEM   | transmission electron microscopy;               |
| TGA   | thermal gravimetric analysis;                   |
| TiN   | Titanium nitride;                               |
| TIP   | Titanium (IV) isopropoxide;                     |
| TPD   | temperature programmed desorption;              |
| XPS   | X-ray photoelectron spectroscopy;               |
| XRD   | X-ray diffraction                               |

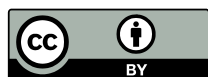

© 2018 by the authors. Submitted for possible open access publication under the terms and conditions of the Creative Commons Attribution (CC BY) license (<http://creativecommons.org/licenses/by/4.0/>).
